# Supplementary material
Source: ML conference proceedings conference paper supplement (https://proceedings.neurips.cc/paper_files/paper/2013/hash/68a83eeb494a308fe5295da69428a507-Abstract.html)
Supplement: Supplementary file [file 68a83eeb494a308fe5295da69428a507-Supplemental.zip]

## Appendix A

### Newton's method for finding a MAP estimate

We obtain the MAP estimate  $\hat{\mathbf{w}}_t$  by maximizing the log-conditional posterior

$$\Phi(\mathbf{w}_t) := \log p(\mathcal{D}|\mathbf{w}_t, M'_x) - \frac{1}{2} \mathbf{w}_t^T C_{\mathbf{w}}^{-1} \mathbf{w}_t + c. \quad (1)$$

The derivative expressions of  $\Phi(\mathbf{w}_t)$  with respect to  $\mathbf{w}_t$  are given by

$$\frac{\partial}{\partial \mathbf{w}_t} \Phi(\mathbf{w}_t) = \frac{\partial}{\partial \mathbf{w}_t} \mathcal{L}(\mathbf{w}_t) - C_{\mathbf{w}}^{-1} \mathbf{w}_t, \quad (2)$$

$$\frac{\partial^2}{\partial \mathbf{w}_t^2} \Phi(\mathbf{w}_t) = -H_t - C_{\mathbf{w}}^{-1}, \quad (3)$$

where  $\mathcal{L}(\mathbf{w}_t) = \log p(\mathcal{D}|\mathbf{w}_t, M'_x)$ , and  $H_t = -\frac{\partial^2}{\partial \mathbf{k}_t^2} \mathcal{L}(\mathbf{k}_t)$ . We decompose  $H_t$  into three parts,

$$H_t = M'_x{}^T Z M'_x, \quad \text{where } Z = -\text{diag} \left[ \frac{\mathbf{y}(g g'' - g'^2) - g^2 g''}{g^2} \right], \quad (4)$$

and  $g = g(M'_x \mathbf{k}_t)$ ,  $g' = \frac{g}{g+1}$ ,  $g'' = \frac{g}{(g+1)^2}$ . The multiplication and division in eq. 4 are element by element operations.

Newton's method iterates the following:

$$\begin{aligned} \mathbf{w}_t^{new} &= \mathbf{w}_t - [\frac{\partial^2}{\partial \mathbf{w}_t^2} \Phi(\mathbf{w}_t)]^{-1} [\frac{\partial}{\partial \mathbf{w}_t} \Phi(\mathbf{w}_t)], \\ &= \mathbf{w}_t + (H_t + C_{\mathbf{w}}^{-1})^{-1} (\frac{\partial}{\partial \mathbf{w}_t} \mathcal{L}(\mathbf{w}_t) - C_{\mathbf{w}}^{-1} \mathbf{w}_t), \\ &= (W W^T + C_{\mathbf{w}}^{-1})^{-1} (H_t \mathbf{w}_t + \frac{\partial}{\partial \mathbf{w}_t} \mathcal{L}(\mathbf{w}_t)), \quad \text{where } H_t = M'_x{}^T Z M_x = W W^T, \quad W = M'_x{}^T Z^{\frac{1}{2}}, \\ &= C_{\mathbf{w}} (I + W W^T C_{\mathbf{w}})^{-1} (H_t \mathbf{w}_t + \frac{\partial}{\partial \mathbf{w}_t} \mathcal{L}(\mathbf{w}_t)), \\ C_{\mathbf{w}}^{-1} \mathbf{w}_t^{new} &= (I + W W^T C_{\mathbf{w}})^{-1} b, \quad \text{where } b = H_t \mathbf{w}_t + \frac{\partial}{\partial \mathbf{w}_t} \mathcal{L}(\mathbf{w}_t) \\ \mathbf{w}_t^{new} &= C_{\mathbf{w}} a, \quad \text{where } a = (I + W W^T C_{\mathbf{w}})^{-1} b \end{aligned}$$

here, we save  $a$  to avoid inverting  $C_{\mathbf{w}}$  in evidence optimization. During iterations, we check if the objective,  $\Phi(\mathbf{w}_t)$  is increasing. If not, we decrease the step size.

Using the notations above, the conditional log-evidence is,

$$\log p(\mathcal{D}|\theta_t, \sigma_b^2, \gamma, \mathbf{k}_x)|_{\mathbf{w}_t=\hat{\mathbf{w}}_t} \approx \log p(\mathcal{D}|\hat{\mathbf{w}}_t, M'_x) - \frac{1}{2} \hat{\mathbf{w}}_t^T a - \frac{1}{2} \log |C_{\mathbf{w}} H_t + I|,$$

## Appendix B

### Conditional posterior for $\mathbf{k}_x$ and evidence for $\theta_x$ given $(b, \mathbf{k}_t)$

The conditional evidence for  $\theta_x$  given  $(b, \mathbf{k}_t)$  is

$$p(\mathcal{D}|\theta_x, b, \mathbf{k}_t) \propto \int \text{Poiss}(\mathbf{y}|g(M_t \mathbf{k}_x + b \mathbf{1})) \mathcal{N}(\mathbf{k}_x|0, A_t^{-1} \otimes C_x) d\mathbf{k}_x \quad (5)$$

The integrand is proportional to the conditional posterior over  $\mathbf{k}_x$  given  $(b, \mathbf{k}_t)$ , which we approximate to a Gaussian distribution via Laplace approximation

$$p(\mathbf{k}_x|\theta_x, b, \mathbf{k}_t, \mathcal{D}) \approx \mathcal{N}(\hat{\mathbf{k}}_x, \Sigma_x), \quad (6)$$

where  $\hat{\mathbf{k}}_x$  is the conditional MAP estimate of  $\mathbf{k}_x$  obtained by numerically maximizing the log-conditional posterior for  $\mathbf{k}_x$ ,

$$\begin{aligned} \log p(\mathbf{k}_x|\theta_x, b, \mathbf{k}_t, \mathcal{D}) &= \mathbf{y}^T \log(g(M_t \mathbf{k}_x + b \mathbf{1})) - g(M_t \mathbf{k}_x + b \mathbf{1}) - \frac{1}{2} \mathbf{k}_x^T (A_t^{-1} \otimes C_x)^{-1} \mathbf{k}_x + c, \\ \text{and } \Sigma_x &\text{ is the covariance of the conditional posterior obtained by the second derivative of the log-conditional posterior around its mode } \Sigma_x^{-1} = H_x + (A_t^{-1} \otimes C_x)^{-1}, \text{ where the Hessian of the negative log-likelihood is denoted by } H_x = -\frac{\partial^2}{\partial \mathbf{k}_x^2} \log p(\mathcal{D}|\mathbf{k}_x, M_t). \end{aligned}$$

Under the Gaussian posterior, the log conditional evidence at  $\mathbf{k}_x = \hat{\mathbf{k}}_x$  is simply

$$\begin{aligned} \log p(\mathcal{D}|\theta_x, b, \mathbf{k}_t)|_{\mathbf{k}_x=\hat{\mathbf{k}}_x} &\approx \log p(\mathcal{D}|\mathbf{k}_x, M_t) - \frac{1}{2} \hat{\mathbf{k}}_x^T (A_t^{-1} \otimes C_x)^{-1} \hat{\mathbf{k}}_x - \frac{1}{2} \log |\Sigma_x^{-1} (A_t^{-1} \otimes C_x)|, \\ \text{which we maximize to set } &\theta_x. \end{aligned}$$
